RETRACTION

# Withdrawal: Astragaloside IV combined with quercetin attenuates silica-induced pulmonary fibrosis by promoting autophagy and suppressing pyroptosis

The *PLOS One* Editors

This article [1] was published in error by PLOS after the authors requested withdrawal. Therefore, *PLOS One* has withdrawn this article [1] and removed the article contents from the journal website. The publisher apologizes for the error.

## Reference

1. Zhu W, Zhao N, Ma Y, Zhang W, Ma J, Cao M, et al. Astragaloside IV combined with quercetin attenuates silica-induced pulmonary fibrosis by promoting autophagy and suppressing pyroptosis. *PLoS One*. 2025;20(6):e0327255. <https://doi.org/10.1371/journal.pone.0327255> PMID: [40561127](https://pubmed.ncbi.nlm.nih.gov/40561127/)

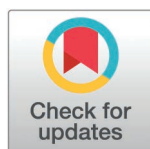

## OPEN ACCESS

**Citation:** The *PLOS One* Editors (2025) Withdrawal: Astragaloside IV combined with quercetin attenuates silica-induced pulmonary fibrosis by promoting autophagy and suppressing pyroptosis. *PLoS One* 20(10): e0333459. <https://doi.org/10.1371/journal.pone.0333459>

**Published:** October 1, 2025

**Copyright:** © 2025 The *PLOS One* Editors. This is an open access article distributed under the terms of the [Creative Commons Attribution License](https://creativecommons.org/licenses/by/4.0/), which permits unrestricted use, distribution, and reproduction in any medium, provided the original author and source are credited.
